# Supplementary material for: Eosin Y-sensitized partially oxidized Ti3C2 MXene for photocatalytic hydrogen evolution
Source: Royal Society of Chemistry journal article supplement (doi:10.1039/c8cy02240b), 2018-11-23
Supplement: c8cy02240b1.pdf [file c8cy02240b1.pdf]

## Supporting Information

### Eosin Y-Sensitized Partially Oxidized Ti<sub>3</sub>C<sub>2</sub> MXene for Photocatalytic Hydrogen Evolution

Yuliang Sun<sup>a</sup>, Yuan Sun<sup>a</sup>, Xing Meng<sup>a,c</sup>, Yu Gao<sup>a</sup>, Yohan Dall'Agnes<sup>a</sup>, Gang Chen<sup>a,b</sup>,  
Chunxiang Dall'Agnes<sup>a</sup>, Xiao-Feng Wang<sup>a,\*</sup>

*<sup>a</sup>Key Laboratory of Physics and Technology for Advanced Batteries (Ministry of Education),  
College of Physics, Jilin University, Changchun 130012, PR China*

*<sup>b</sup>State Key Laboratory of Superhard Materials, Jilin University, Changchun 130012, PR China*

*<sup>c</sup>A. J. Drexel Nanomaterials Institute, and Department of Materials Science and Engineering,  
Drexel University, Philadelphia, Pennsylvania 19104, United States*

Corresponding author

\*Xiao-Feng Wang: [xf\\_wang@jlu.edu.cn](mailto:xf_wang@jlu.edu.cn)

The XRD spectra of  $\text{Ti}_3\text{AlC}_2$  and  $\text{TiO}_2$  (anatase) were showed in supporting information. The FT-IR of different samples and Raman and PL spectra of  $\text{TiO}_2$  were also demonstrated.

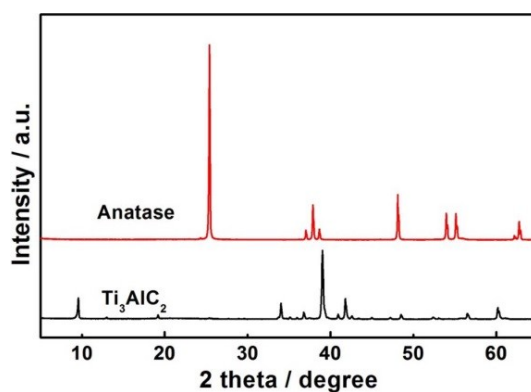

Figure S1. The XRD spectra of  $\text{Ti}_3\text{AlC}_2$  and  $\text{TiO}_2$  (anatase).

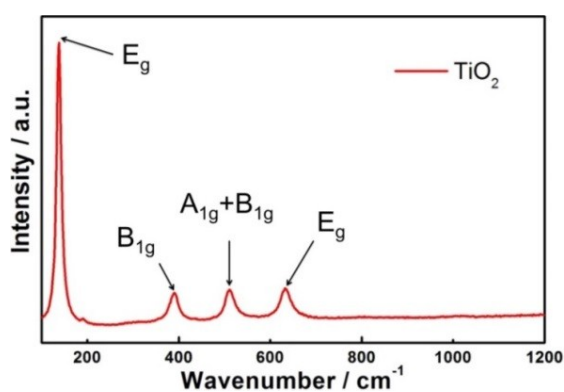

Figure S2. The Raman spectra of  $\text{TiO}_2$ .

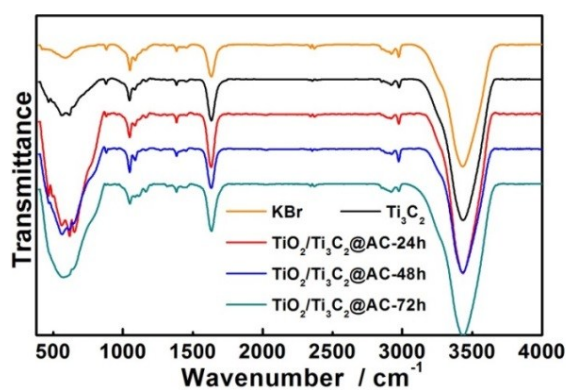

Figure S3. The FT-IR spectra of different samples.

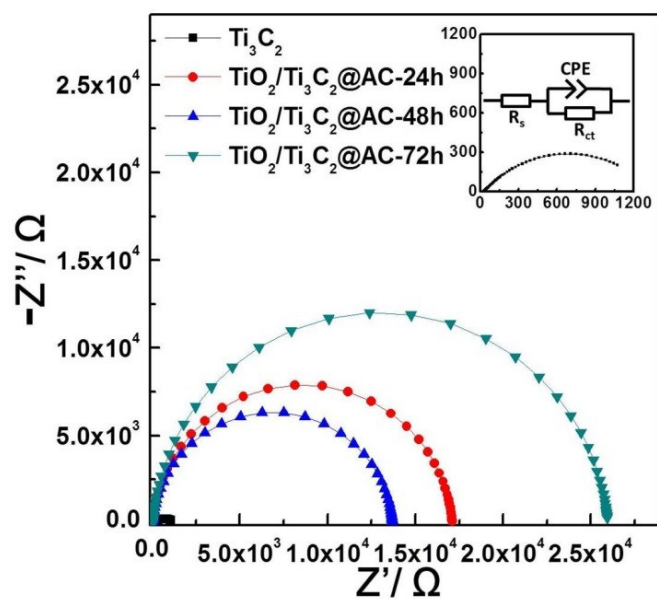

Figure S4. The Nyquist plots for  $\text{Ti}_3\text{C}_2$ ,  $\text{TiO}_2/\text{Ti}_3\text{C}_2@AC-24h$ ,  $\text{TiO}_2/\text{Ti}_3\text{C}_2@AC-48h$  and  $\text{TiO}_2/\text{Ti}_3\text{C}_2@AC-72h$ .

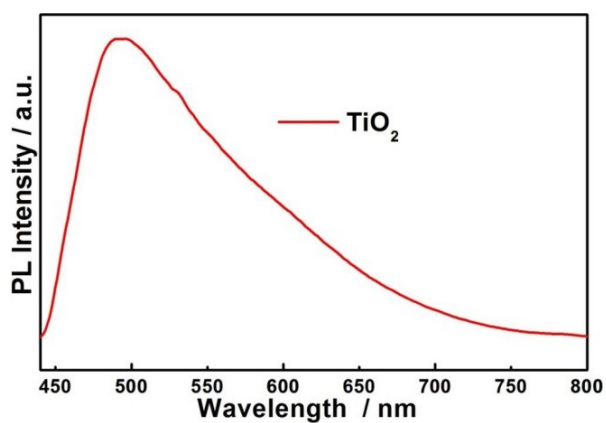

Figure S5. The PL spectra of  $\text{TiO}_2$ .

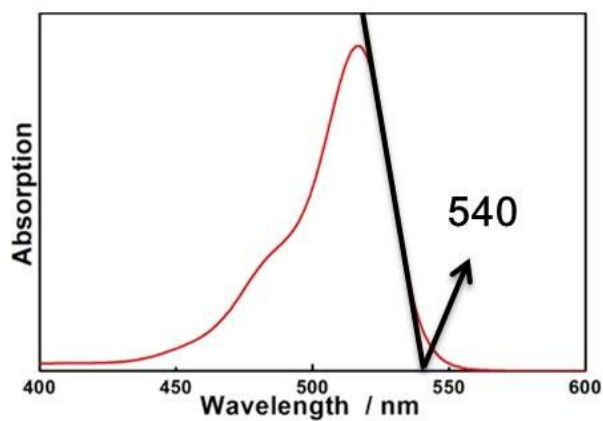

Figure S6. The absorption spectra of EY.

Table S1. The fitting data of Nyquist plots for  $\text{Ti}_3\text{C}_2$ ,  $\text{TiO}_2/\text{Ti}_3\text{C}_2@\text{AC}-24\text{h}$ ,  $\text{TiO}_2/\text{Ti}_3\text{C}_2@\text{AC}-48\text{h}$  and  $\text{TiO}_2/\text{Ti}_3\text{C}_2@\text{AC}-72\text{h}$ .

| Samples                                                   | $R_s/\Omega$ | $R_{ct}/\Omega$ | CPE-P |
|-----------------------------------------------------------|--------------|-----------------|-------|
| $\text{Ti}_3\text{C}_2$                                   | 30           | 1319            | 0.52  |
| $\text{TiO}_2/\text{Ti}_3\text{C}_2@\text{AC}-24\text{h}$ | 27           | 17086           | 0.95  |
| $\text{TiO}_2/\text{Ti}_3\text{C}_2@\text{AC}-48\text{h}$ | 24           | 13678           | 0.95  |
| $\text{TiO}_2/\text{Ti}_3\text{C}_2@\text{AC}-72\text{h}$ | 26           | 25932           | 0.95  |
